# Supplementary material for: Ultra-flexible organic solar cells based on eco-friendly cellulose substrate with efficiency approaching 19%
Source: Royal Society of Chemistry journal article supplement (doi:10.1039/d4ta07622b), 2024-12-10
Supplement: d4ta07622b1.pdf [file d4ta07622b1.pdf]

## Supporting Information

### **Ultra-flexible organic solar cells based on eco-friendly cellulose substrate with efficiency approaching 19%**

Zheng Xiao<sup>a</sup>, Jian Liu<sup>a</sup>, Xin Chen<sup>a</sup>, Zhaochen Suo<sup>a</sup>, Xiangjian Cao<sup>a</sup>, Nuo Xu<sup>a</sup>, Zhaoyang Yao<sup>a</sup>, Chenxi Li<sup>a</sup>, Xiangjian wan<sup>\*a</sup> and Yongsheng Chen<sup>\*a</sup>

State Key Laboratory of Elemento-Organic Chemistry, Key Laboratory of Functional Polymer Materials, College of Chemistry, Renewable Energy Conversion and Storage Center (RECAST), Nankai University, Tianjin 300071, China.

E-mail: xjwan@nankai.edu.cn, yschen99@nankai.edu.cn

**Materials:**

All materials were used as obtained unless otherwise indicated. Silver nanowires (AgNWs) (10 wt% in H<sub>2</sub>O with an average length of ~25 μm and diameter of ~35 nm) were purchased from Zhejiang Kechuang Adv. Mater. Co., Ltd. PM6, BO-4Cl, Y6, PBDB-T and ITIC-4F were purchased from Solarmer Materials (Beijing) Inc. L8-BO was purchased from Jiaxing Hyper Inc. Poly (sodium 4-styrenesulfonate) (PSSNa, Mw ~500,000, powder), 1,8-diiodooctane (DIO) were purchased from Sigma-Aldrich. Ethyl cellulose (EC), Ethoxylated trimethylolpropane triacrylate (ETPTA) and 2-Hydroxy-2-methylpropiophenone were purchased from Adamas Reagent Co., Ltd. The indium-doped tin oxide (ITO)-coated glass and PET/ITO, PEN/ITO were purchased from Liaoning Advanced Election Technology. ZnO nanoparticles (NPs) were synthesized according to the literature.<sup>1</sup>

**Electrode Fabrication:**

The EC solution was prepared by dissolving 0.05 g of EC into 1 mL of methanol (Kemiou, 99.8%). After EC solution was filtered, different contents of ETPTA with 2-Hydroxy-2-methylpropiophenone (3wt%, as initiator) were added to obtain EC@ETPTA solution. EC@ETPTA solution were deposited on the glass by spin coating to obtain the EC@ETPTA films (7-8 μm). For preparing EC@ETPTA/AgNWs electrode, the EC@ETPTA substrate was treated by plasma for 8 min and a thin layer (~20 nm) ZnO NPs was deposited on the flexible substrate, then AgNWs was spinning coated following our previous report.<sup>2</sup>

**Electrode characterization.**

Sheet resistances of the glass/ITO, PET/ITO, PEN/ITO and EC@ETPTA/AgNWs were measured with a ST-2258C four-probe instrument (Suzhou Jingge Electronic). Atomic force microscope (AFM) investigation was performed using Bruker MultiMode 8 in tapping mode. AFM-IR experiments were carried out using a commercial AFM-IR setup (Bruker nanoIR 3) that consists of an AFM microscope operating in contact mode and a Quantum Cascade Laser (QCL laser). The surface and cross-section morphologies of EC@ETPTA and EC@ETPTA/AgNWs were measured by SEM (ZEISSMERLIN Compact). The stretch ability was measured by cupping machine (Transcell Technology BAB-10MT). The UV-Vis spectra were obtained by a Cary

5000 UV-Vis spectrophotometer. The thermal expansion coefficient measurements were performed using a Thermal Mechanical Analysis (TMA) (PE DMA8000). The Stress-strain measurements were performed using a mechanical tester (CTM-2GD) with a pre-strain of 5% in the temperature range of 25°C at an environmental RH of 35%.

### **Device fabrication:**

The OSCs devices were fabricated using an inverted structure of Electrode/ZnO /active layers/MoO<sub>x</sub>/Ag. For rigid devices, ITO was ultrasonically cleaned with detergent, deionized water, acetone, isopropanol and UV-treated for 15 min. ZnO nanoparticle (ZnO NPs)<sup>3</sup> layer (~ 20 nm) was deposited by spin coating on top of precleaned ITO substrates and annealed at 120 °C for 10 mins. Different active layers were deposited following procedures in previous reports<sup>4-8</sup>. Then, MoO<sub>x</sub> (~5 nm) and Ag (~100 nm) were successively evaporated onto the active layer through a shadow mask (pressure ca. 10<sup>-4</sup> Pa). The device area is ~4 mm<sup>2</sup>. The flexible devices based on the EC@ETPTA/AgNWs and PET/ITO and PEN/ITO electrodes were fabricated following the same procedure to that of the rigid devices.

### **Device characterization.**

The J-V characteristics of photovoltaic devices were measured using a Keithley 2400 source measure unit, with a fixed scan speed of 0.02 V s<sup>-1</sup> and dwell times of 20 ms for the J-V curves. The photocurrent was measured under illumination simulated 100 mW cm<sup>-2</sup> AM1.5G irradiation using an Enli SS-F5-3A solar simulator, calibrated with a standard Si solar cell (Enli Technology Co., Ltd., Taiwan, and calibrated report can be traced to NREL). The external quantum efficiency (EQE) spectrum was measured using a QE-R Solar Cell Spectral Response Measurement System (Enli Technology Co., Ltd., Taiwan). The thickness of film and device was measured using a Veeco Dektak 150 profilometer.

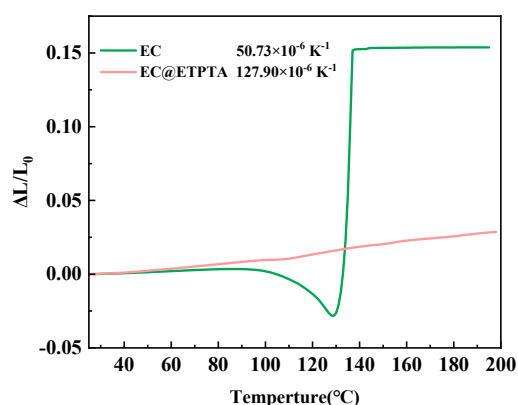

**Fig. S1.** The values of thermal expansion coefficients (TEC) for the EC and EC@ETPTA.

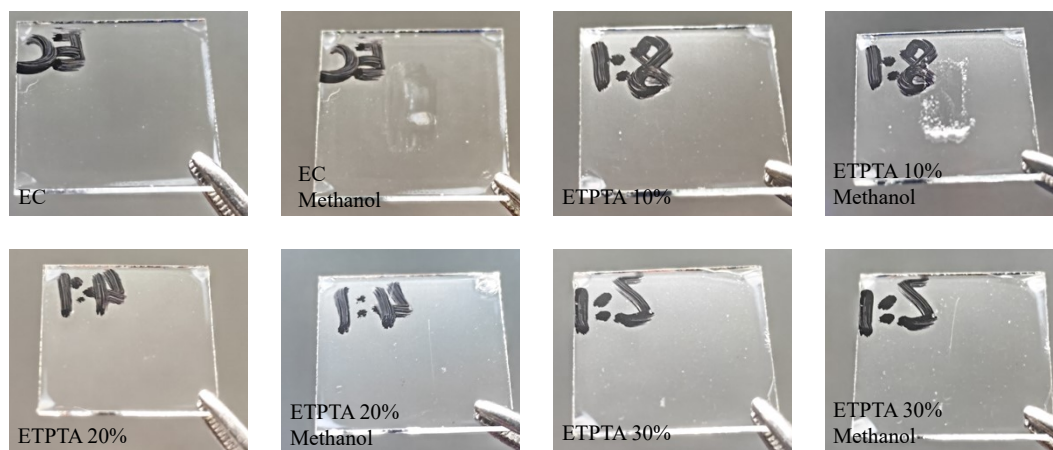

**Fig. S2.** Pure EC and EC@ETPTA films with different ETPTA contents were subjected to solvent resistance testing against methanol following ASTM D5402-19.

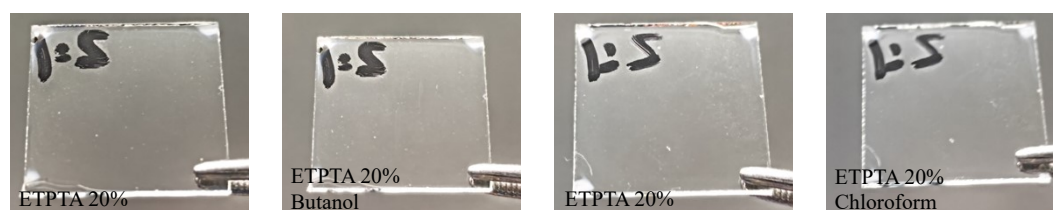

**Fig. S3.** Stability of EC@ETPTA films with 20% ETPTA content were subjected to solvent resistance testing against butanol and chloroform following ASTM D5402-19.

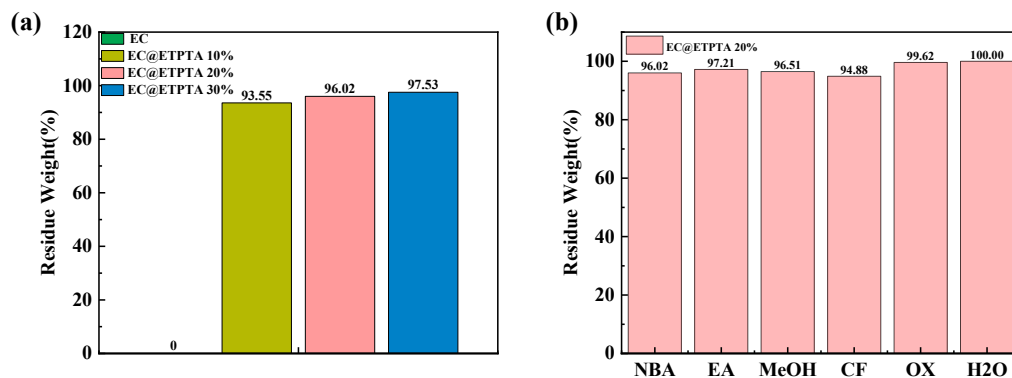

**Fig. S4.** Residue weight of the a) dried EC and EC@ETPTTA containing different ETPTA content films after soaking in n-butanol and b) EC@ETPTTA containing 20% ETPTA after soaking in different solvents for 24 h.

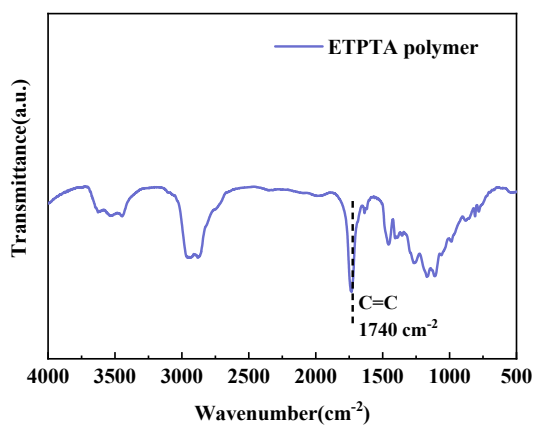

**Fig. S5.** FT-IR spectra of ETPTA polymer.

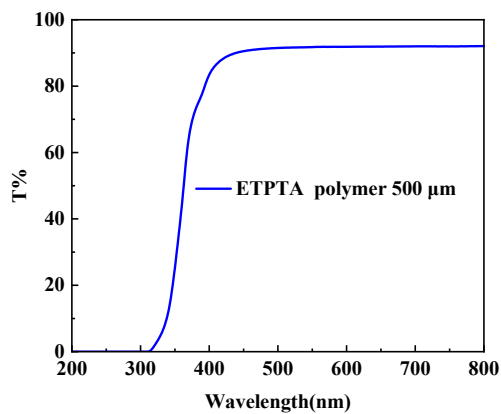

**Fig. S6.** Transmittance spectra of ETPTA.

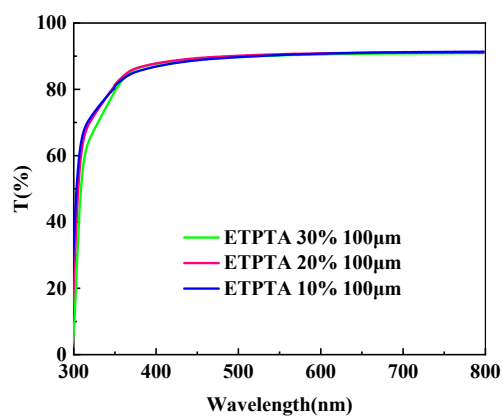

**Fig. S7.** Transmittance spectra of EC@ETPTA films with different ETPTA contents.

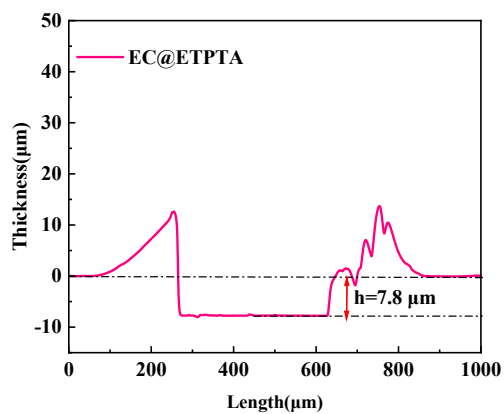

**Fig. S8.** The thickness of EC@ETPTA film was measured by a profiler.

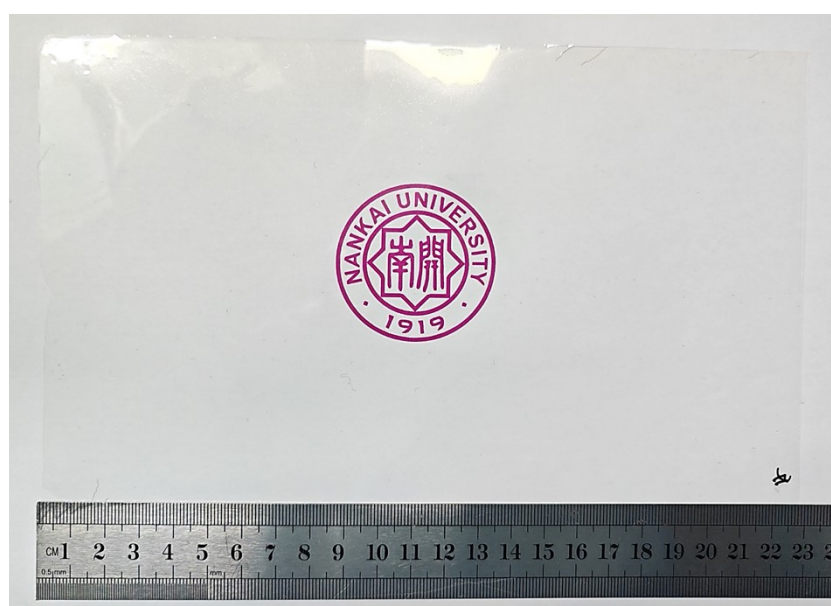

**Fig. S9.** Authentic pictures of EC@ETPTA (23×13 cm).

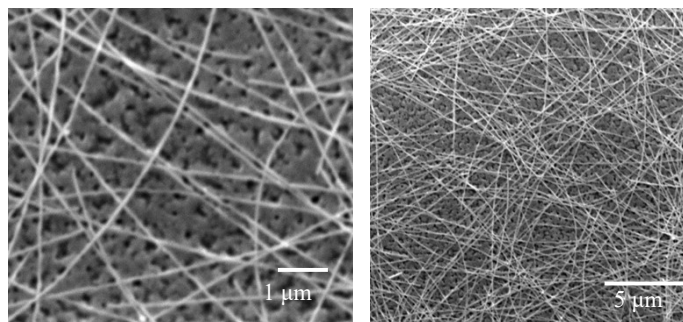

**Fig. S10.** SEM image of EC@ETPTA/AgNWs film.

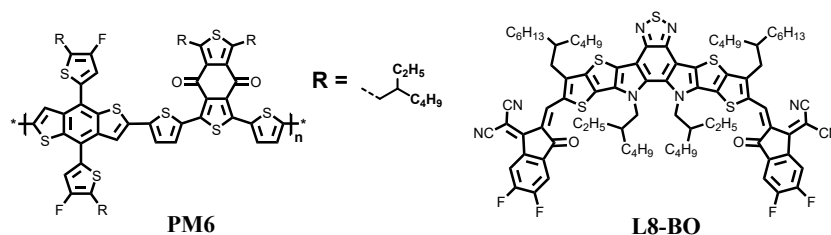

**Fig. S11.** Chemical structure of PM6, L8-BO.

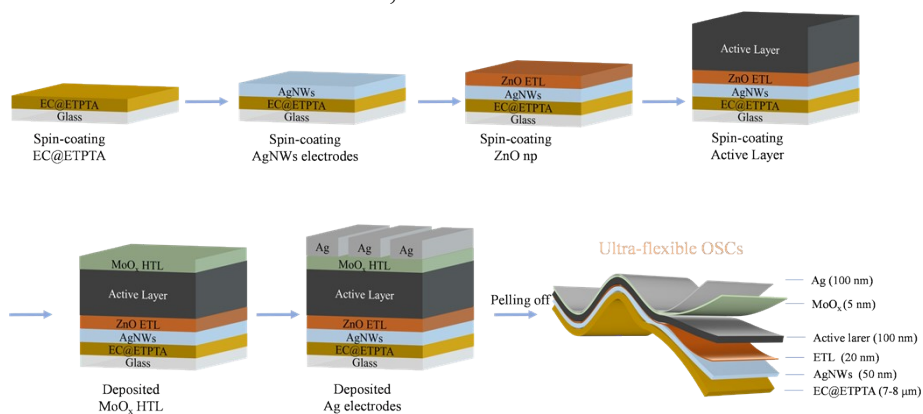

**Fig. S12.** The schematic diagram of the detailed preparation process of ultra-flexible OSCs.

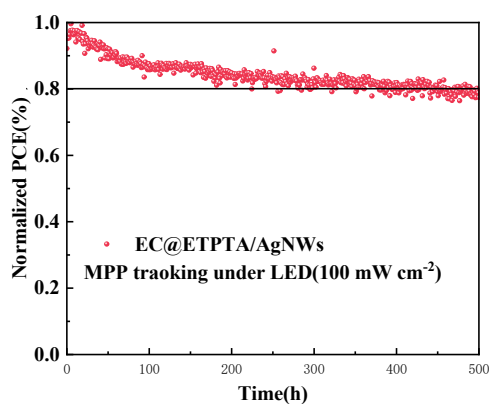

**Fig. S13.** illumination stability at maximum power point (MPP) tracking of the flexible devices based on EC@ETPTA/AgNWs.

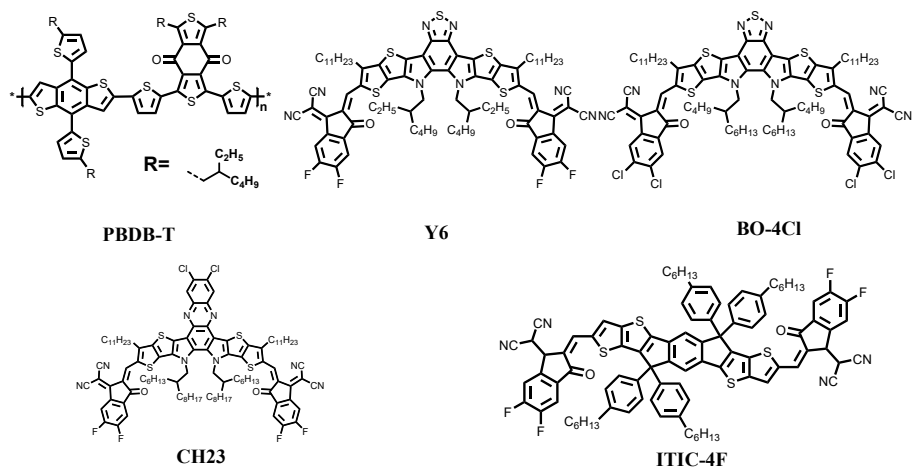

**Fig. S14.** Chemical structure of PBDB-T, Y6, BO-4Cl, CH23 and ITIC-4F.

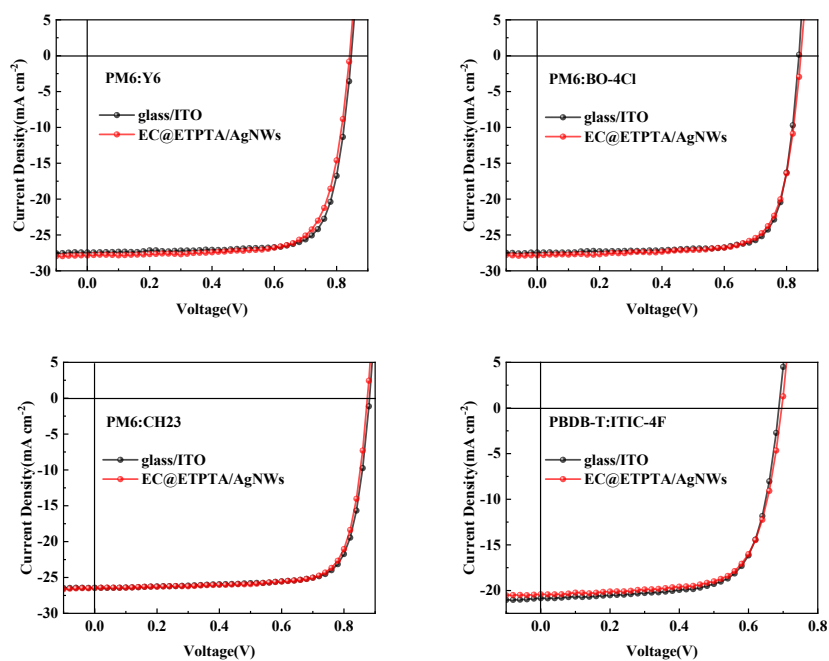

**Fig. S15.** J-V curves of OSCs based on EC@ETPTA/AgNWs and glass/ITO electrodes with different active layers.



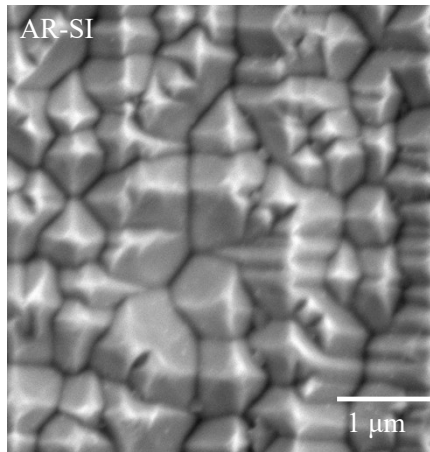

**Fig. S16.** SEM image of a silicon wafer with AR structure (AR-Si).

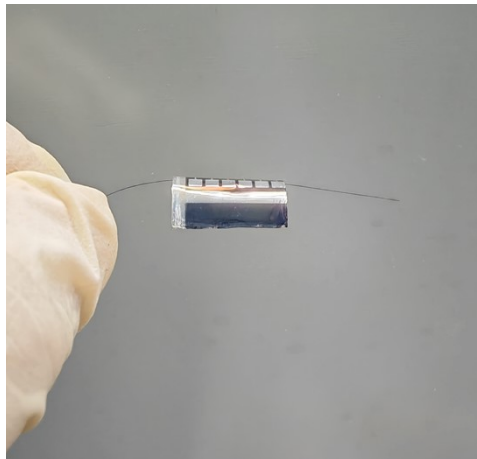

**Fig. S17.** The display of an ultra-flexible OSCs device on a single human hair.

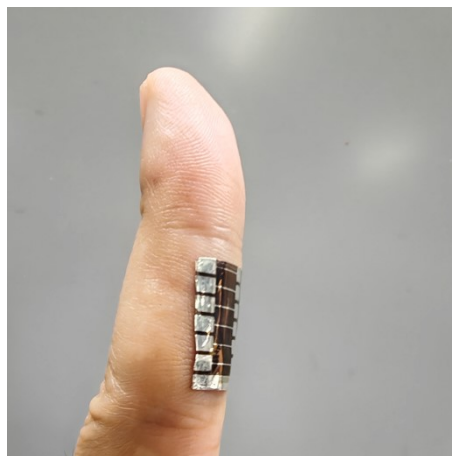

**Fig. S18.** Photograph of the free-standing OPVs attached to a finger.

#### 4. Supplementary Tables

**Table S1.** Properties of different electrode.

| Electrode       | T(%)<br>@550 nm | Rsh<br>( $\Omega/\square$ ) | FoM    |
|-----------------|-----------------|-----------------------------|--------|
| Glass/ITO       | 89.56           | 12.45                       | 267.12 |
| EC@PEGDMA/AgNWs | 88.92           | 21.04                       | 148.14 |
| PEN/ITO         | 83.52           | 16.48                       | 121.39 |
| PET/ITO         | 74.20           | 12.67                       | 92.46  |

**Table S2.** Photovoltaic parameters of recently reported flexible OSCs

| Device structure                                                                        | $V_{oc}$<br>[V] | $J_{sc}$<br>[mA cm <sup>-2</sup> ] | FF<br>[%] | PCE<br>[%] | Refs         |
|-----------------------------------------------------------------------------------------|-----------------|------------------------------------|-----------|------------|--------------|
| PPZA/ZnO/PM6: N3: PC <sub>71</sub> BM/MoO <sub>3</sub> /Ag                              | 0.840           | 25.00                              | 76.50     | 16.10      | 9            |
| PET/AgNWs/ZnO: CsCO <sub>3</sub> /D18: Y6: PCB <sub>71</sub> M/MoO <sub>3</sub> /Ag     | 0.862           | 26.44                              | 77.43     | 17.64      | 10           |
| Em-AgNW FTE/ZnO/ PM6: L8-BO/MoO <sub>3</sub> /Ag                                        | 0.834           | 24.26                              | 76.34     | 15.41      | 11           |
| PET/Ag grids/D-PH1000/ PEDOT: PSS/D18: N3: QX-<br>α/PDINN/Ag                            | 0.856           | 27.21                              | 77.30     | 18.01      | 12           |
| PDMS/AgNWs/ZnO: CsCO <sub>3</sub> /D18: Y6: PCB <sub>71</sub> M/MoO <sub>3</sub> /Ag    | 0.860           | 26.94                              | 16.48     | 17.72      | 13           |
| Em-Ag/AgNWs:AZO-SG/PBDB-T-2F: Y6/MoO <sub>3</sub> /Al                                   | 0.832           | 25.05                              | 72.97     | 15.21      | 14           |
| PET/AgNWs@SnO <sub>x</sub> /ZnO/PM6: L8-BO/MoO <sub>3</sub> /Ag                         | 0.860           | 25.5                               | 75.80     | 16.60      | 15           |
| PET/AgNW:PDA: AgNP /AZO/PBDB-T-2F: BTP-<br>ec9:PCB <sub>71</sub> M/MoO <sub>3</sub> /Ag | 0.830           | 27.44                              | 74.96     | 17.07      | 16           |
| AgNWs@CPI/ZnO/PM6: BTP-4Cl/MoO <sub>3</sub> /Ag                                         | 0.780           | 24.77                              | 74.35     | 14.37      | 17           |
| PET/Em-Ag/AgNWs/AZO/PM6: BTP-eC9:<br>PC71BM/MoO <sub>3</sub> /Ag                        | 0.835           | 27.37                              | 76.90     | 17.52      | 18           |
| FlexAgNEs/ZnO NPs/PFN-Br/PM6: Y6/MoO <sub>3</sub> /Ag                                   | 0.829           | 25.43                              | 74.50     | 15.71      | 3            |
| EC/PI/AgNWs/ZnO NPs/NMAO/PM6: L8-BO/MoO <sub>3</sub> /Ag                                | 0.875           | 26.38                              | 78.26     | 18.05      | 4            |
| AR-EC@ETPTA/AgNWs/ZnO NPs/NMAO/PM6: L8-<br>BO/MoO <sub>3</sub> /Ag                      | 0.876           | 27.67                              | 77.13     | 18.71      | This<br>work |

## References

1. W. J. E. Beek, M. M. Wienk, M. Kemerink, X. N. Yang and R. A. J. Janssen, *Journal of Physical Chemistry B*, 2005, **109**, 9505-9516.
2. Y. N. Sun, M. J. Chang, L. X. Meng, X. J. Wan, H. H. Gao, Y. M. Zhang, K. Zhao, Z. H. Sun, C. X. Li, S. R. Liu, H. K. Wang, J. J. Liang and Y. S. Chen, *Nature Electronics*, 2019, **2**, 513-520.
3. Y. Sun, L. Meng, X. Wan, Z. Guo, X. Ke, Z. Sun, K. Zhao, H. Zhang, C. Li and Y. Chen, *Advanced Functional Materials*, 2021, **31**, 2010000.
4. Z. Xiao, S. Li, J. Liu, X. Chen, Z. Suo, C. Li, X. Wan and Y. Chen, *Solar RRL*, 2024, **8**, 2400206.
5. X. Cao, J. Guo, Z. Li, X. Bi, H. Liang, Z. Xiao, Y. Guo, X. Jia, Z. Xu, K. Ma, Z. Yao, B. Kan, X. Wan, C. Li and Y. Chen, *ACS Energy Letters*, 2023, **8**, 3494-3503.
6. H. Liang, H. Chen, P. Wang, Y. Zhu, Y. Zhang, W. Feng, K. Ma, Y. Lin, Z. Ma, G. Long, C. Li, B. Kan, Z. Yao, H. Zhang, X. Wan and Y. Chen, *Advanced Functional Materials*, 2023, **33**, 2301573.
7. S. H. K. Paleti, S. Hultmark, N. Ramos, N. Gasparini, A.-H. Emwas, J. Martin, C. Müller and D. Baran, *Solar RRL*, 2022, **6**, 2200436.
8. S. T. Li, Q. Fu, L. X. Meng, X. J. Wan, L. M. Ding, G. Y. Lu, G. H. Lu, Z. Y. Yao, C. X. Li and Y. S. Chen, *Angewandte Chemie-International Edition*, 2022, **61**, e20220397.
9. T. Y. Qu, L. J. Zuo, J. D. Chen, X. Shi, T. Zhang, L. Li, K. C. Shen, H. Ren, S. Wang, F. M. Xie, Y. Q. Li, A. K. Y. Jen and J. X. Tang, *Advanced Optical Materials*, 2020, **8**, 2000669.
10. H. Y. Hou, Y. F. Zhang and J. D. Chen, *Chemical engineering journal*, 2022, **450**, 138181.
11. H. Li, Q. Chen, G. Zhang, Z. Zhang, J. Fang, C. Zhao and W. Li, *Journal of Materials Chemistry A*, 2023, **11**, 158-166.
12. Z. Chen, J. Zhu, D. Yang, W. Song, J. Shi, J. Ge, Y. Guo, X. Tong, F. Chen and Z. Ge, *Energy & Environmental Science*, 2023, **16**, 3119-3127.
13. Y. F. Zhang, H. Ren, J. D. Chen, H. Y. Hou, H. M. Liu, S. Tian, W. S. Chen, H. R. Ge, Y. Q. Li, H. Mao, Z. Su and J. X. Tang, *Advanced Functional Materials*, 2023, **33**, 2212260.
14. X. Chen, G. Xu, G. Zeng, H. Gu, H. Chen, H. Xu, H. Yao, Y. Li, J. Hou and Y. Li, *Adv Mater*, 2020, **32**, e1908478.
15. C. Xie, C. Xiao, J. Fang, C. Zhao and W. Li, *Nano Energy*, 2023, **107**, 108153.
16. Y. Chen, J. Wan, G. Xu, X. Wu, X. Li, Y. Shen, F. Yang, X. Ou, Y. Li and Y. Li, *Science China Chemistry*, 2022, **65**, 1164-1172.
17. Y. Wang, Q. Chen, G. Zhang, C. Xiao, Y. Wei and W. Li, *ACS Appl Mater Interfaces*, 2022, **14**, 5699-5708.
18. G. Zeng, W. J. Chen, X. B. Chen, Y. Hu, Y. Chen, B. Zhang, H. Y. Chen, W. W. Sun, Y. X. Shen, Y. W. Li, F. Yan and Y. F. Li, *Journal of the American Chemical Society*, 2022, **144**, 8658-8668.
